# Supplementary material for: β-Cyclodextrin Stationary Phase Using Tetrafluoroterephthalonitrile as Spacer Arm for Separation of Phenolic Compounds
Source: Research Square preprint supplement (doi:10.21203/rs.3.rs-7475722/v1), 2025-09-23
Supplement: Supplementary file 1 [file f1ba63a9629da43bf175e925.docx]

**β-Cyclodextrin Stationary Phase Using Tetrafluoroterephthalonitrile as Spacer Arm for Separation of Phenolic Compounds**

Li Jiang1, Le Duan2, Yan Teng2, Ineza Urujeni Gisèle2,Geyuan Li*3 and Deli Xiao*2,4,5.

1 Department of Pharmacy, Jiangxi Cancer Hospital, Nanchang 330029, China.

2 Department of Analytical Chemistry, China Pharmaceutical University, Nanjing 210009, China.

3 State Key Laboratory on Technologies for Chinese Medicine Pharmaceutical Process Control and Intelligent Manufacture, School of Pharmacy, Nanjing University of Chinese Medicine, Nanjing 210023, China.

4 Key Laboratory of Drug Quality Control and Pharmacovigilance (China Pharmaceutical University), Ministry of Education, 24 Tongjia Lane, Nanjing 210009, China.

5 Key Laboratory of Biomedical Functional Materials, China Pharmaceutical University, Nanjing 210009, China.

† Li Jiang, Le Duan and Yan Teng equally contributed to this work and should be considered co-first authors.

* Corresponding Authors: Deli Xiao, Geyuan Li.

E-mail address: [xiao49562001@163.com](mailto:xiao49562001@163.com), 300539@NJUCM.edu.cn.


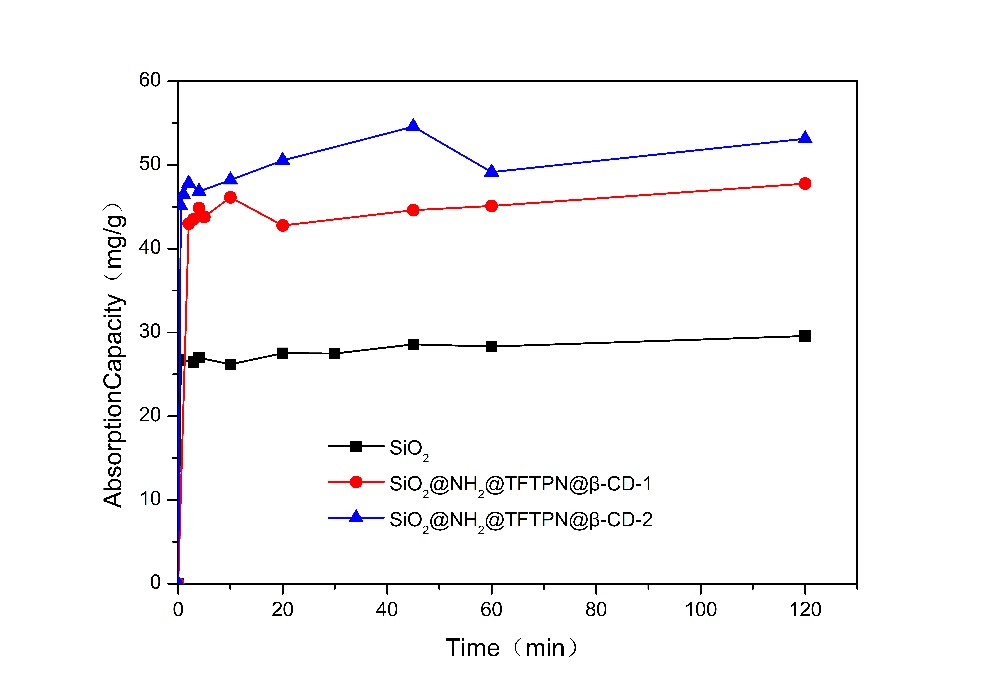


FIGURE S1 Kinetic adsorption curves of 1-naphthol on three kinds of materials


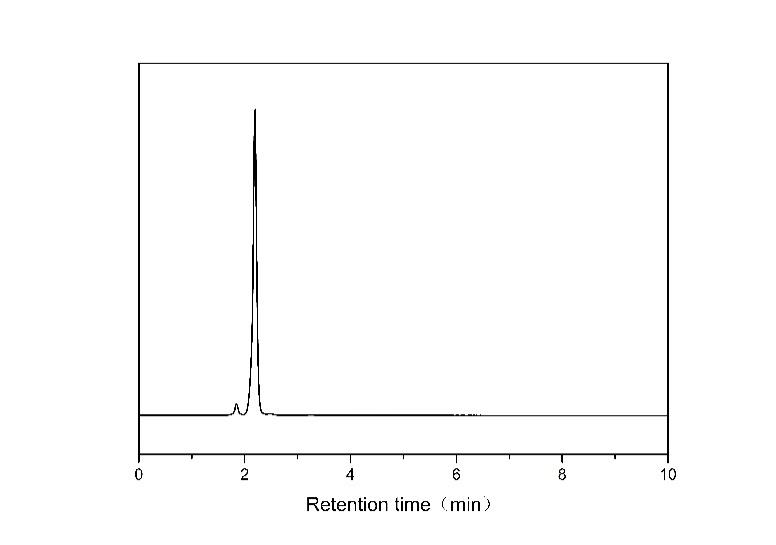


FIGURE S2 Column efficiency evaluation. Chromatographic conditions: mobile phase: Acetonitrile; injection volume: 5 μL; UV detection wavelength: 254 nm; column temperature: 30 ºC; flow rate: 1.0 mL min-1.


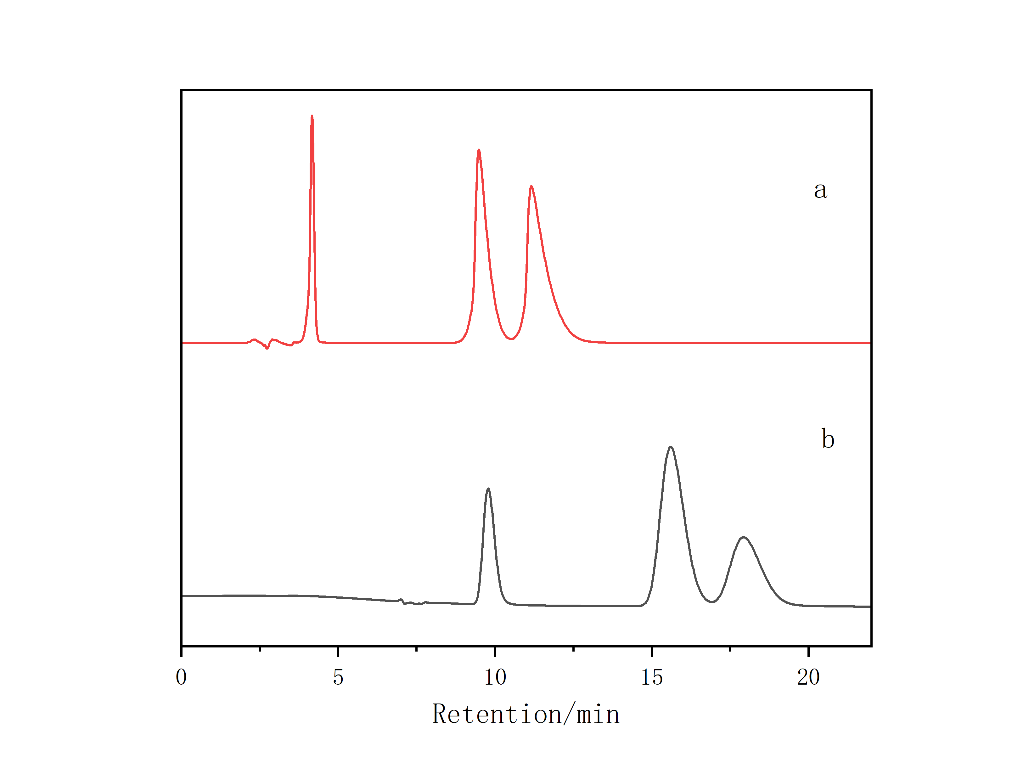


FIGURE S3 A stands for the separation of β-cyclodextrin column, left to right, it is phenol, 2- naphthol and 1- naphthol; B represents the separation of C18 column, left to right, it is phenol, 1- naphthol and 2- naphthol.


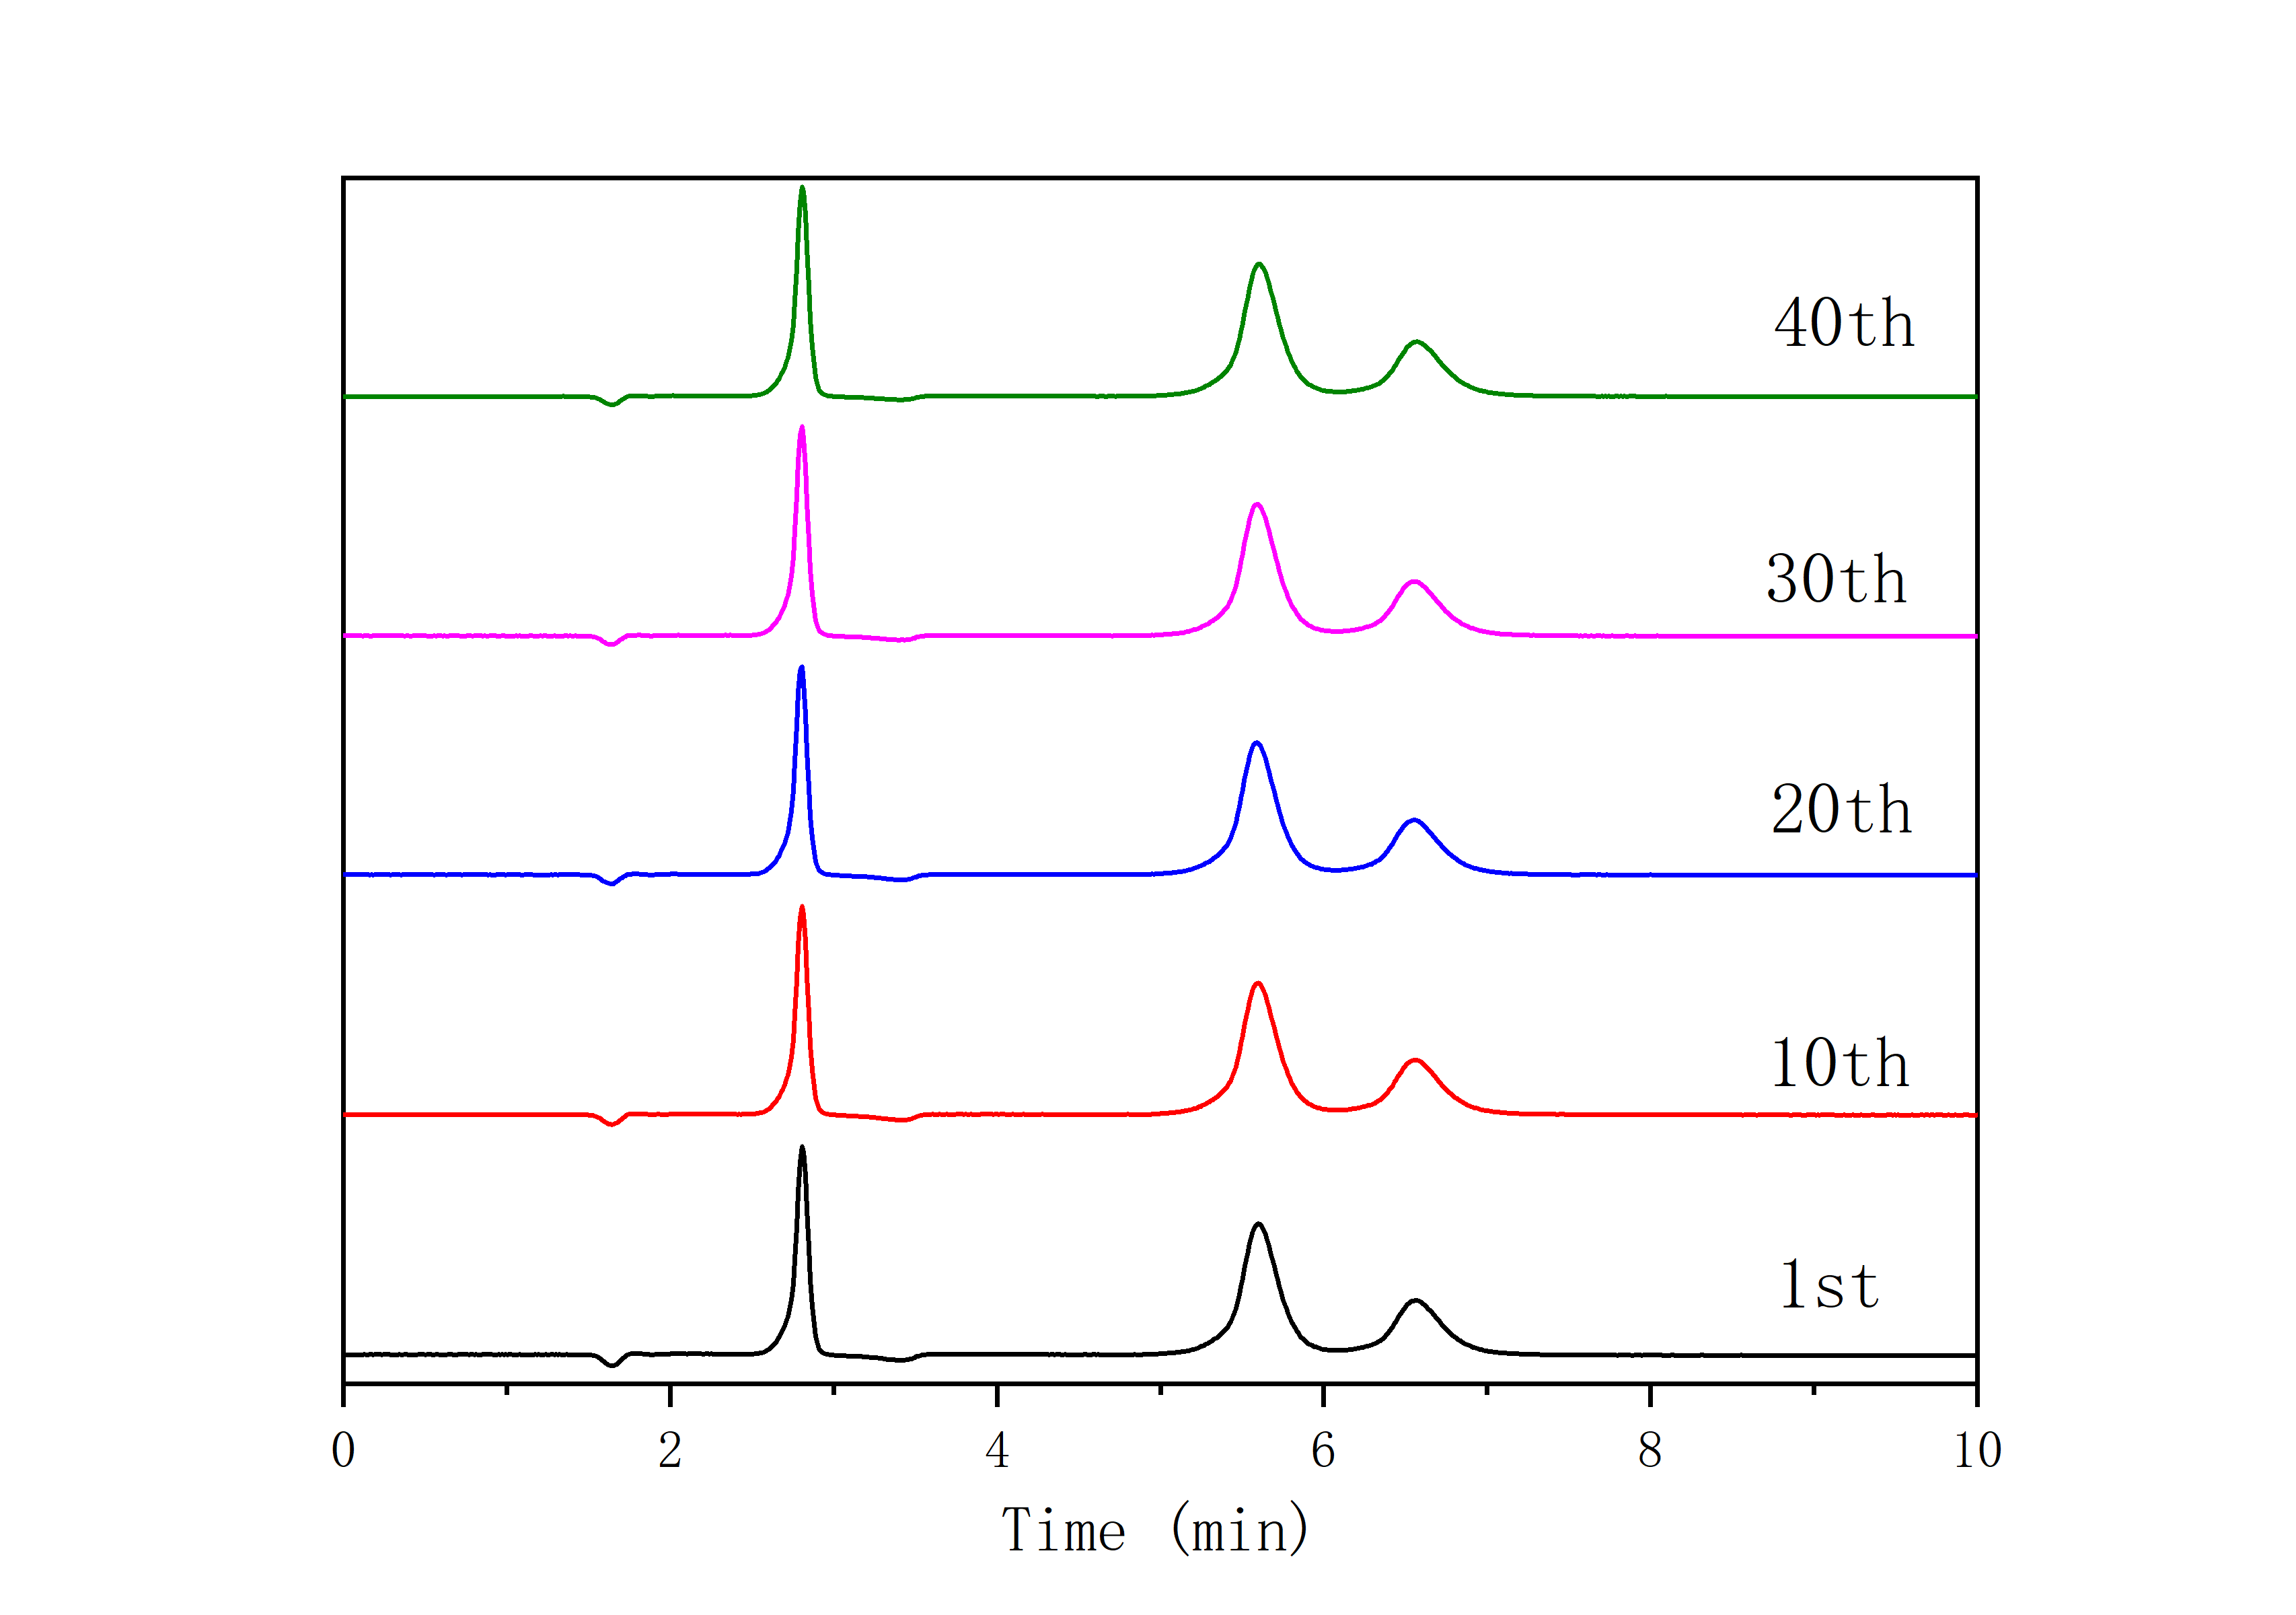
 FIGURE S4 Repeatability and stability of cyclodextrin column. Chromatographic conditions: mobile phase: Acetonitrile / 0.01mol/L ammonium acetate at pH 3.0 (50:50, v/v); sample concentration: 50 μg/mL; injection volume: 5 μL; UV detection wavelength: 280 nm; column temperature: 30 ºC; flow rate: 1.0 mL min-1.


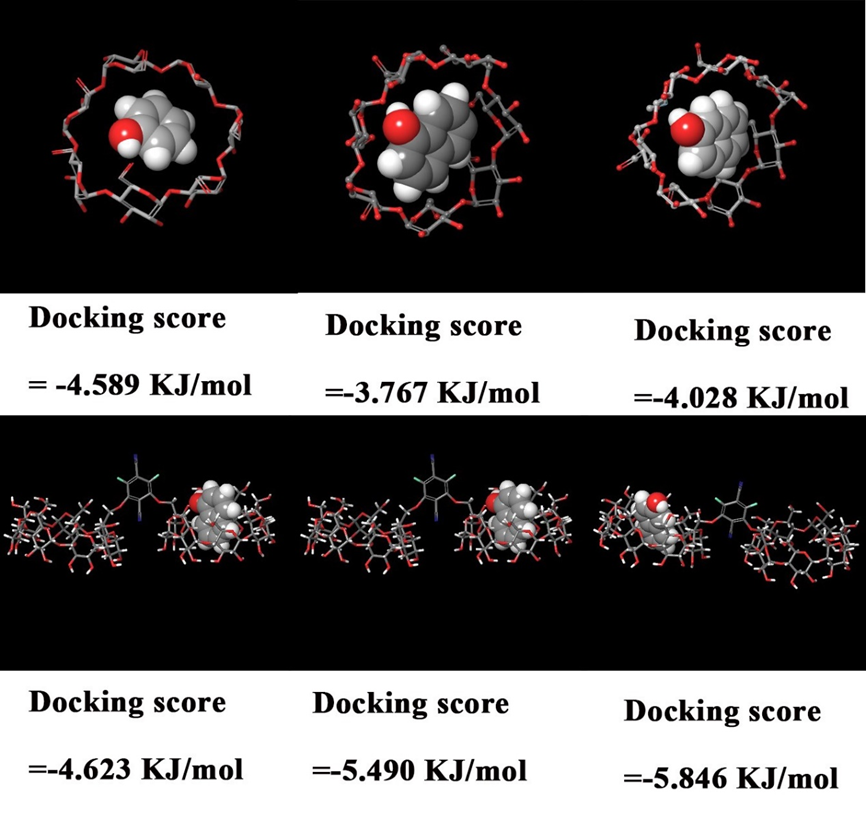
 FIGURE S5 β-CD and cyclodextrin stationary phase docking with three phenolic compounds. (a1-a3) The docking energies of phenols with β-CD are: phenol (-4.589 kJ/mol), 1-naphthol (-3.767 kJ/mol) and 2-naphthol (-4.028 kJ/mol). (b1-b3) The docking energies of phenols with cyclodextrin stationary phase were: phenol (-4.623 kJ/mol), 1-naphthol (-5.490 kJ/mol) and 2-naphthol (-5.846 kJ/mol).

**b2**

**b3**

**b1**

**a3**

**a2**

**a1**

TABLE S1 Common commercial cyclodextrin chromatographic columns

| brand | model | Stationary phase | Isolated compound | Apply to system |
| --- | --- | --- | --- | --- |
| Singapore  Size of Thai | ChiralCD-1 | β -cyclodextrin derivatives | O -, M -, P-nitroaniline, flavanone etc | Positive phase /  Reverse phase |
| ChiralCD-3 | β -cyclodextrin derivatives | O -, M -, P-nitrophenol, 4-hydroxyl flavanone, etc | Positive phase /  Reverse phase |
| Shanghai  Xu in science and technology | Ultimate CD-S | Esterification of β -cyclodextrin by single - bonded phenyl carbamate | Acid compounds, amino acid derivatives | Positive phase /  Reverse phase |
| Ultimate CD-M | Esterification of β -cyclodextrin by multi-bonded phenyl carbamate | A neutral or acidic compound containing phenyl, naphthalene and cyanide | Positive phase /  Reverse phase |
| YMC | CD-BR | Bonded cyclodextrin bromide | Optical and structural isomers | Reverse phase |
| RON peterson | CHIRALLTA T2 | Covalently bonded cyclodextrin - (phenyl carbamate) on silica gel surface | Compounds containing phenyl，naphthalene and cyanides are also suitable for chiral resolution of metal complexes | Positive phase /  Reverse phase |
| CHIRALLTA T3 | Covalently bonded cyclodextrin - (3-chloro-4-methylphenyl carbamate) on silica gel surface | Positive phase /  Reverse phase |
| CHIRALLTA T5 | Covalently bonded cyclodextrin - (3, 5-dichlorophenyl carbamate) on silica gel surface | Positive phase /  the |
| Japan's sumitomo | OA-7000 | Silicone surface sugar chain bonding  Beta cyclodextrins | Aromatic, aliphatic ketones, aromatic amines and other compounds | Reverse phase |

TABLE S2 Elemental analysis results of β-cyclodextrin stationary phase

| Material types | Data types | C % | H % | N % |
| --- | --- | --- | --- | --- |
| β-CD (theoretical value) | Theoretical value | 44 | 6 | 0 |
| TFTPN (theoretical value) | Theoretical value | 48 | 0 | 14 |
| SiO2@NH2(Starting material) | Experimental value | 7.22 | 2.00 | 2.37 |
| SiO2@NH2@TFTPN @β-CD-1 | Experimental value | 12.46 | 1.58 | 3.85 |
| SiO2@NH2@TFTPN @β-CD-2 | Experimental value | 15.11 | 1.97 | 3.95 |

TABLE S3 Effect of mobile phase proportion on the separation of phenolic structural analogues

| Acetonitrile content | Retention time (min) | | | Resolution | |
| --- | --- | --- | --- | --- | --- |
| Phenol | 2-Naphthol | 1-Naphthol | Phenol,  2-Naphthol | 1-Naphthol,  2-Naphthol |
| 80% | 2.713 | 3.359 | 3.460 | 1.837 | 0.188 |
| 70% | 2.924 | 3.835 | 4.054 | 3.924 | 0.694 |
| 60% | 3.170 | 4.664 | 5.069 | 5.884 | 1.108 |
| 50% | 3.570 | 6.236 | 7.020 | 8.112 | 1.501 |
| 40% | 4.164 | 9.478 | 11.155 | 10.728 | 1.850 |

TABLE S4. Effect of pH values of mobile phase on the separation of phenolic structural analogues

| pH | Retention time (min) | | | Resolution | |
| --- | --- | --- | --- | --- | --- |
| Phenol | 2-Naphthol | 1-Naphthol | Phenol,  1-Naphthol | 1-Naphthol,  2-Naphthol |
| 2.5 | 3.570 | 6.236 | 7.020 | 8.112 | 1.501 |
| 3 | 3.802 | 6.974 | 7.901 | 8.771 | 1.574 |
| 4 | 3.888 | 7.273 | 8.253 | 8.990 | 1.582 |
| 5 | 3.890 | 7.285 | 8.246 | 6.924 | 1.139 |

TABLE S5 Effects of mobile phase composition on the separation results of phenolic compounds

| Mobile phase composition | Column efficiency | Asymmetric factor | Degree of separation | | |
| --- | --- | --- | --- | --- | --- |
| 1-Naphthol | 1-Naphthol | Phenol,  2-Naphthol | | 1-Naphthol,  2-Naphthol |
| a | 9706/m | 1.186 | 8.755 | 1.386 | |
| b | 20926/m | 1.863 | 8.990 | 1.582 | |
